# Supplementary material for: Gadolinium-uptake by aquatic and terrestrial organisms-distribution determined by laser ablation inductively coupled plasma mass spectrometry
Source: Royal Society of Chemistry journal article supplement (doi:10.1039/c5em00533g), 2015-12-17
Supplement: c5em00533g1.pdf [file c5em00533g1.pdf]

## Gadolinium-Uptake by Aquatic and Terrestrial Organisms – Distribution Determined by Laser Ablation Inductively Coupled Plasma Mass Spectrometry

Jana Lingott, Uwe Lindner, Lena Telgmann, Diego Esteban-Fernández, Norbert Jakubowski, Ulrich Panne

**Electronic supplementary information (ESI)**

**table 1:** weight of the contents for WC-medium

| parent solution      | compound                                            | weight of<br>contents [g] | nutrition solution                                       |
|----------------------|-----------------------------------------------------|---------------------------|----------------------------------------------------------|
| I                    | $\text{CaCl}_2 \cdot 2\text{H}_2\text{O}$           | 3.68                      | 4 mL parent solution I to<br>2000 ml nutrition solution  |
|                      | $\text{MgSO}_4 \cdot 7\text{H}_2\text{O}$           | 3.702                     |                                                          |
|                      | $\text{NaHCO}_3$                                    | 1.260                     |                                                          |
|                      | $\text{K}_2\text{HPO}_4 \cdot 3\text{H}_2\text{O}$  | 1.140                     |                                                          |
|                      | $\text{NaNO}_3$                                     | 8.501                     |                                                          |
|                      | $\text{Na}_2\text{SiO}_3 \cdot 9\text{H}_2\text{O}$ | 2.119                     |                                                          |
|                      |                                                     | to 200 mL                 |                                                          |
| II<br>micronutrients | $\text{Na}_2\text{EDTA}$                            | 4.36                      | 1 mL parent solution II to<br>2000 ml nutrition solution |
|                      | $\text{FeCl}_3 \cdot 6\text{H}_2\text{O}$           | 3.152                     |                                                          |
|                      | $\text{CuSO}_4 \cdot 5\text{H}_2\text{O}$           | 0.010                     |                                                          |
|                      | $\text{ZnSO}_4 \cdot 7\text{H}_2\text{O}$           | 0.022                     |                                                          |
|                      | $\text{CoCl}_2 \cdot 6\text{H}_2\text{O}$           | 0.010                     |                                                          |
|                      | $\text{MnCl}_2 \cdot 4\text{H}_2\text{O}$           | 0.180                     |                                                          |
|                      | $\text{Na}_2\text{MoO}_4 \cdot 2\text{H}_2\text{O}$ | 0.010                     |                                                          |
|                      | $\text{H}_3\text{BO}_3$                             | 1.000                     |                                                          |
|                      |                                                     | to 500 mL                 |                                                          |
| III.1<br>vitamin     | vitamin                                             | g per 50 mL               | to 50 mL                                                 |
|                      | biotin                                              | 0.010                     |                                                          |
|                      |                                                     |                           |                                                          |
| III.2<br>vitamin     | parent solution III.1                               | 100 $\mu\text{L}$         | 2 mL parent solution II to<br>2000 mL nutrition solution |
|                      | thiamine HCl                                        | 0.010                     |                                                          |
|                      |                                                     | to 100 mL                 |                                                          |
| HEPES-buffer         |                                                     | 0.201                     | to 2000 mL nutrition solution                            |

**table 2:** weight of the contents for Elendt M4-medium

| parent solution | compound                                            | weight of<br>contents [g] | nutrition solution                                         |
|-----------------|-----------------------------------------------------|---------------------------|------------------------------------------------------------|
| I               | Na <sub>2</sub> EDTA·2H <sub>2</sub> O              | 0.500                     | 1 mL parent solution I to<br>2000 mL nutrition solution    |
|                 | FeSO <sub>4</sub> ·7H <sub>2</sub> O                | 0.199                     |                                                            |
|                 | to 100 mL                                           |                           |                                                            |
| II              | CaCl <sub>2</sub> ·2H <sub>2</sub> O                | 5.879                     | 20 mL parent solution II to<br>2000 mL nutrition solution  |
|                 | MgSO <sub>4</sub> ·7H <sub>2</sub> O                | 2.468                     |                                                            |
|                 | KCl                                                 | 0.117                     |                                                            |
|                 | NaHCO <sub>3</sub>                                  | 1.296                     |                                                            |
|                 | to 200 mL                                           |                           |                                                            |
| III<br>cationen | MnCl <sub>2</sub> ·4H <sub>2</sub> O                | 0.721                     | 1 mL parent solution III to<br>2000 ml nutrition solution  |
|                 | LiCl                                                | 0.613                     |                                                            |
|                 | RbSO <sub>4</sub>                                   | 0.157                     |                                                            |
|                 | SrCl <sub>2</sub> ·6H <sub>2</sub> O                | 0.305                     |                                                            |
|                 | CuCl <sub>2</sub> ·2H <sub>2</sub> O                | 0.033                     |                                                            |
|                 | ZnSO <sub>4</sub>                                   | 0.026                     |                                                            |
|                 | CoCl <sub>2</sub> ·6H <sub>2</sub> O                | 0.021                     |                                                            |
|                 | to 1000 mL                                          |                           |                                                            |
| IV.1<br>anionen | KI                                                  | 0.0065                    | 1 mL parent solution IV.1 to<br>2000 mL nutrition solution |
|                 | Na <sub>2</sub> SeO <sub>3</sub>                    | 0.0044                    |                                                            |
|                 | NH <sub>4</sub> VO <sub>3</sub>                     | 0.0012                    |                                                            |
|                 | NaBr                                                | 0.0320                    |                                                            |
|                 | Na <sub>2</sub> MoO <sub>4</sub> ·2H <sub>2</sub> O | 0.1260                    |                                                            |
|                 | to 1000 mL                                          |                           |                                                            |
| IV.2<br>anionen | H <sub>3</sub> BO <sub>3</sub>                      | 5.722                     | 5 mL parent solution IV.2 to<br>2000 mL nutrition solution |
|                 | NaNO <sub>3</sub>                                   | 27.409                    |                                                            |
|                 | to 100 mL                                           |                           |                                                            |
| V               | KH <sub>2</sub> PO <sub>4</sub>                     | 0.014                     |                                                            |

|           |                                  |           |                                                             |
|-----------|----------------------------------|-----------|-------------------------------------------------------------|
| phosphate | K <sub>2</sub> HPO <sub>4</sub>  | 0.020     |                                                             |
|           |                                  | to 100 mL | 2 mL parent solution V to<br>2000 mL nutrition solution     |
| VI        | Na <sub>2</sub> SiO <sub>3</sub> | 1.000     |                                                             |
| silicate  |                                  | to 500 mL | 1 mL parent solution VI to<br>2000 mL nutrition solution    |
| VII.1     | B12                              | 0.0101    |                                                             |
| vitamin   | biotin                           | 0.0077    |                                                             |
|           |                                  | to 200 mL |                                                             |
| VII.2     | VII.1                            | 2 ml      |                                                             |
| vitamin   | thiamine (HCl)                   | 0.0074    |                                                             |
|           |                                  | to 100 mL | 4 mL parent solution VII.2 to<br>2000 mL nutrition solution |
